# Supplementary material
Source: MDPI journal article supplement (https://www.mdpi.com/1999-4907/11/2/242)

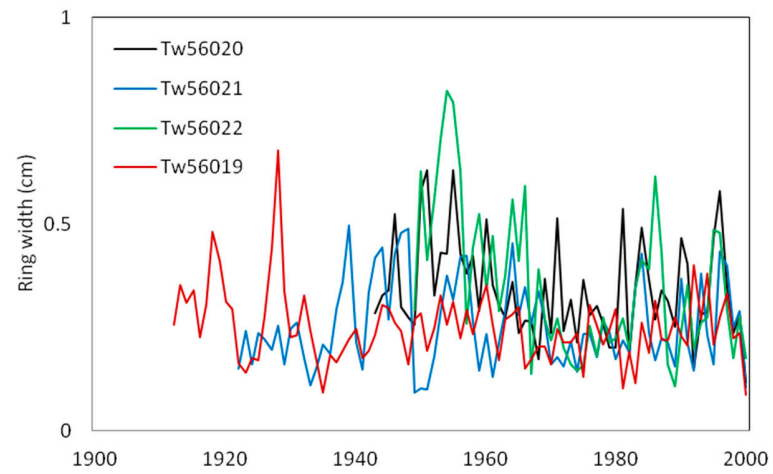

Figure S1: Growth ring series of the crossdated samples of *D. butyracea*.

Supplement: s1 [file s1]
